# Supplementary material for: Studi kelayakan pemindahan lokasi di PT. "XYZ"
Source: eLife journal article supplement (doi:10.7554/elife.69713), 2002-01-01

Source data for WB in Figure 4

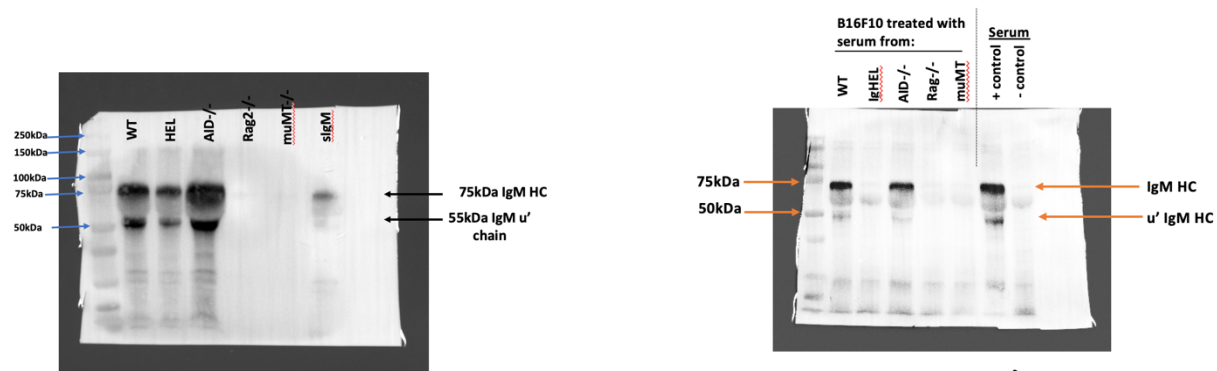

Supplement: fig4-data1 [file elife-69713-fig4-data1-v3.pdf]
