# Supplementary material for: Studi kelayakan pemindahan lokasi di PT. "XYZ"
Source: eLife journal article supplement (doi:10.7554/elife.69713), 2002-01-01
Supplement: supp [file elife-69713-supp-v1.zip]

Archive with 8 entries (8 files):
- elife_poa_e69713_Transparent_Reporting_File.pdf
- elife_poa_e69713_Figure_4_source_data_1.pdf
- elife_poa_e69713_Supplementary_file_1.docx
- elife_poa_e69713_Figure_1_figure_supplement_1.tif
- elife_poa_e69713_Figure_2_figure_supplement_1.tif
- elife_poa_e69713_Figure_3_figure_supplement_1.tif
- elife_poa_e69713_Figure_3_figure_supplement_2.tif
- elife_poa_e69713_Figure_3_figure_supplement_3.tif
