# Supplementary figures and images for: Studi kelayakan pemindahan lokasi di PT. "XYZ"
Source: eLife journal article supplement (doi:10.7554/elife.69713), 2002-01-01

Source data for WB in Figure 4

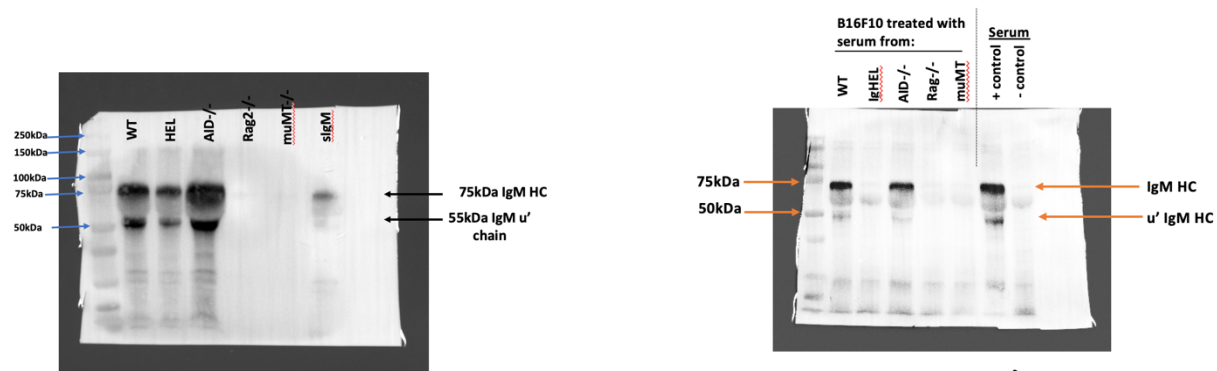

Supplement: supp [file elife-69713-supp-v1.zip › elife_poa_e69713_Figure_4_source_data_1.pdf]

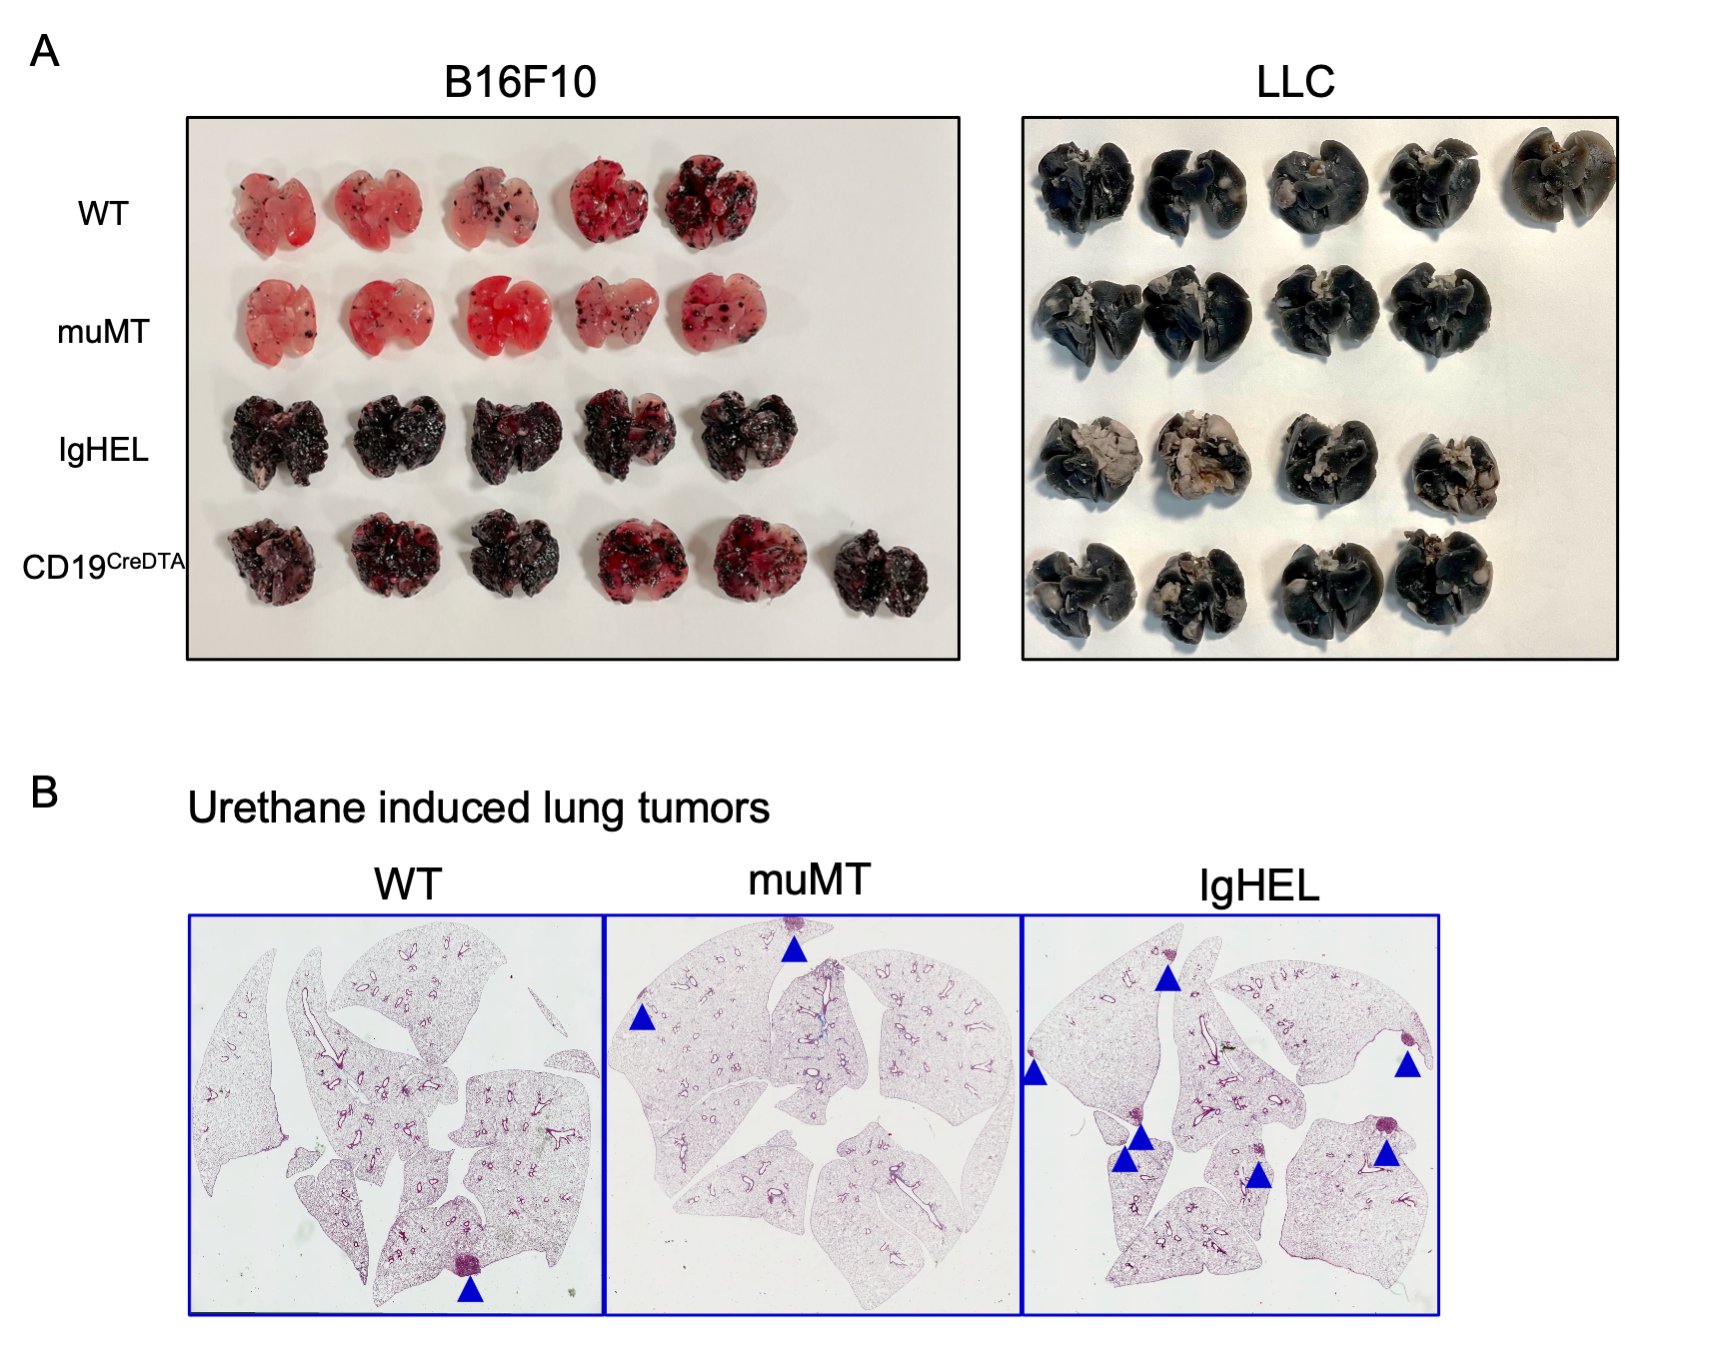

Supplement: supp [file elife-69713-supp-v1.zip › elife_poa_e69713_Figure_1_figure_supplement_1.tif]

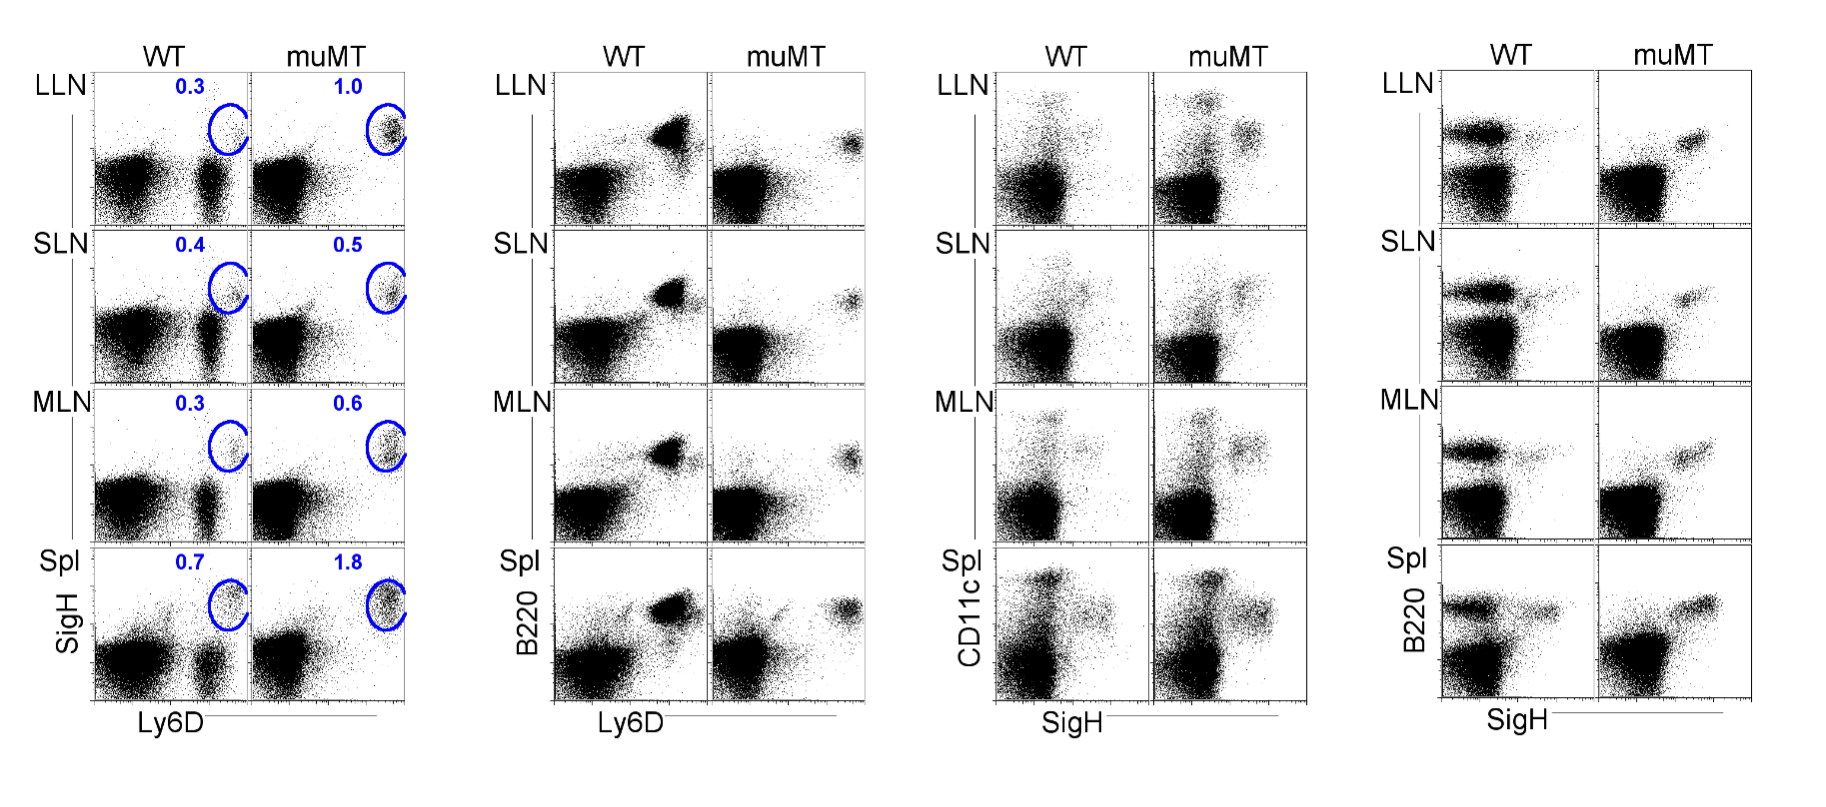

Supplement: supp [file elife-69713-supp-v1.zip › elife_poa_e69713_Figure_2_figure_supplement_1.tif]

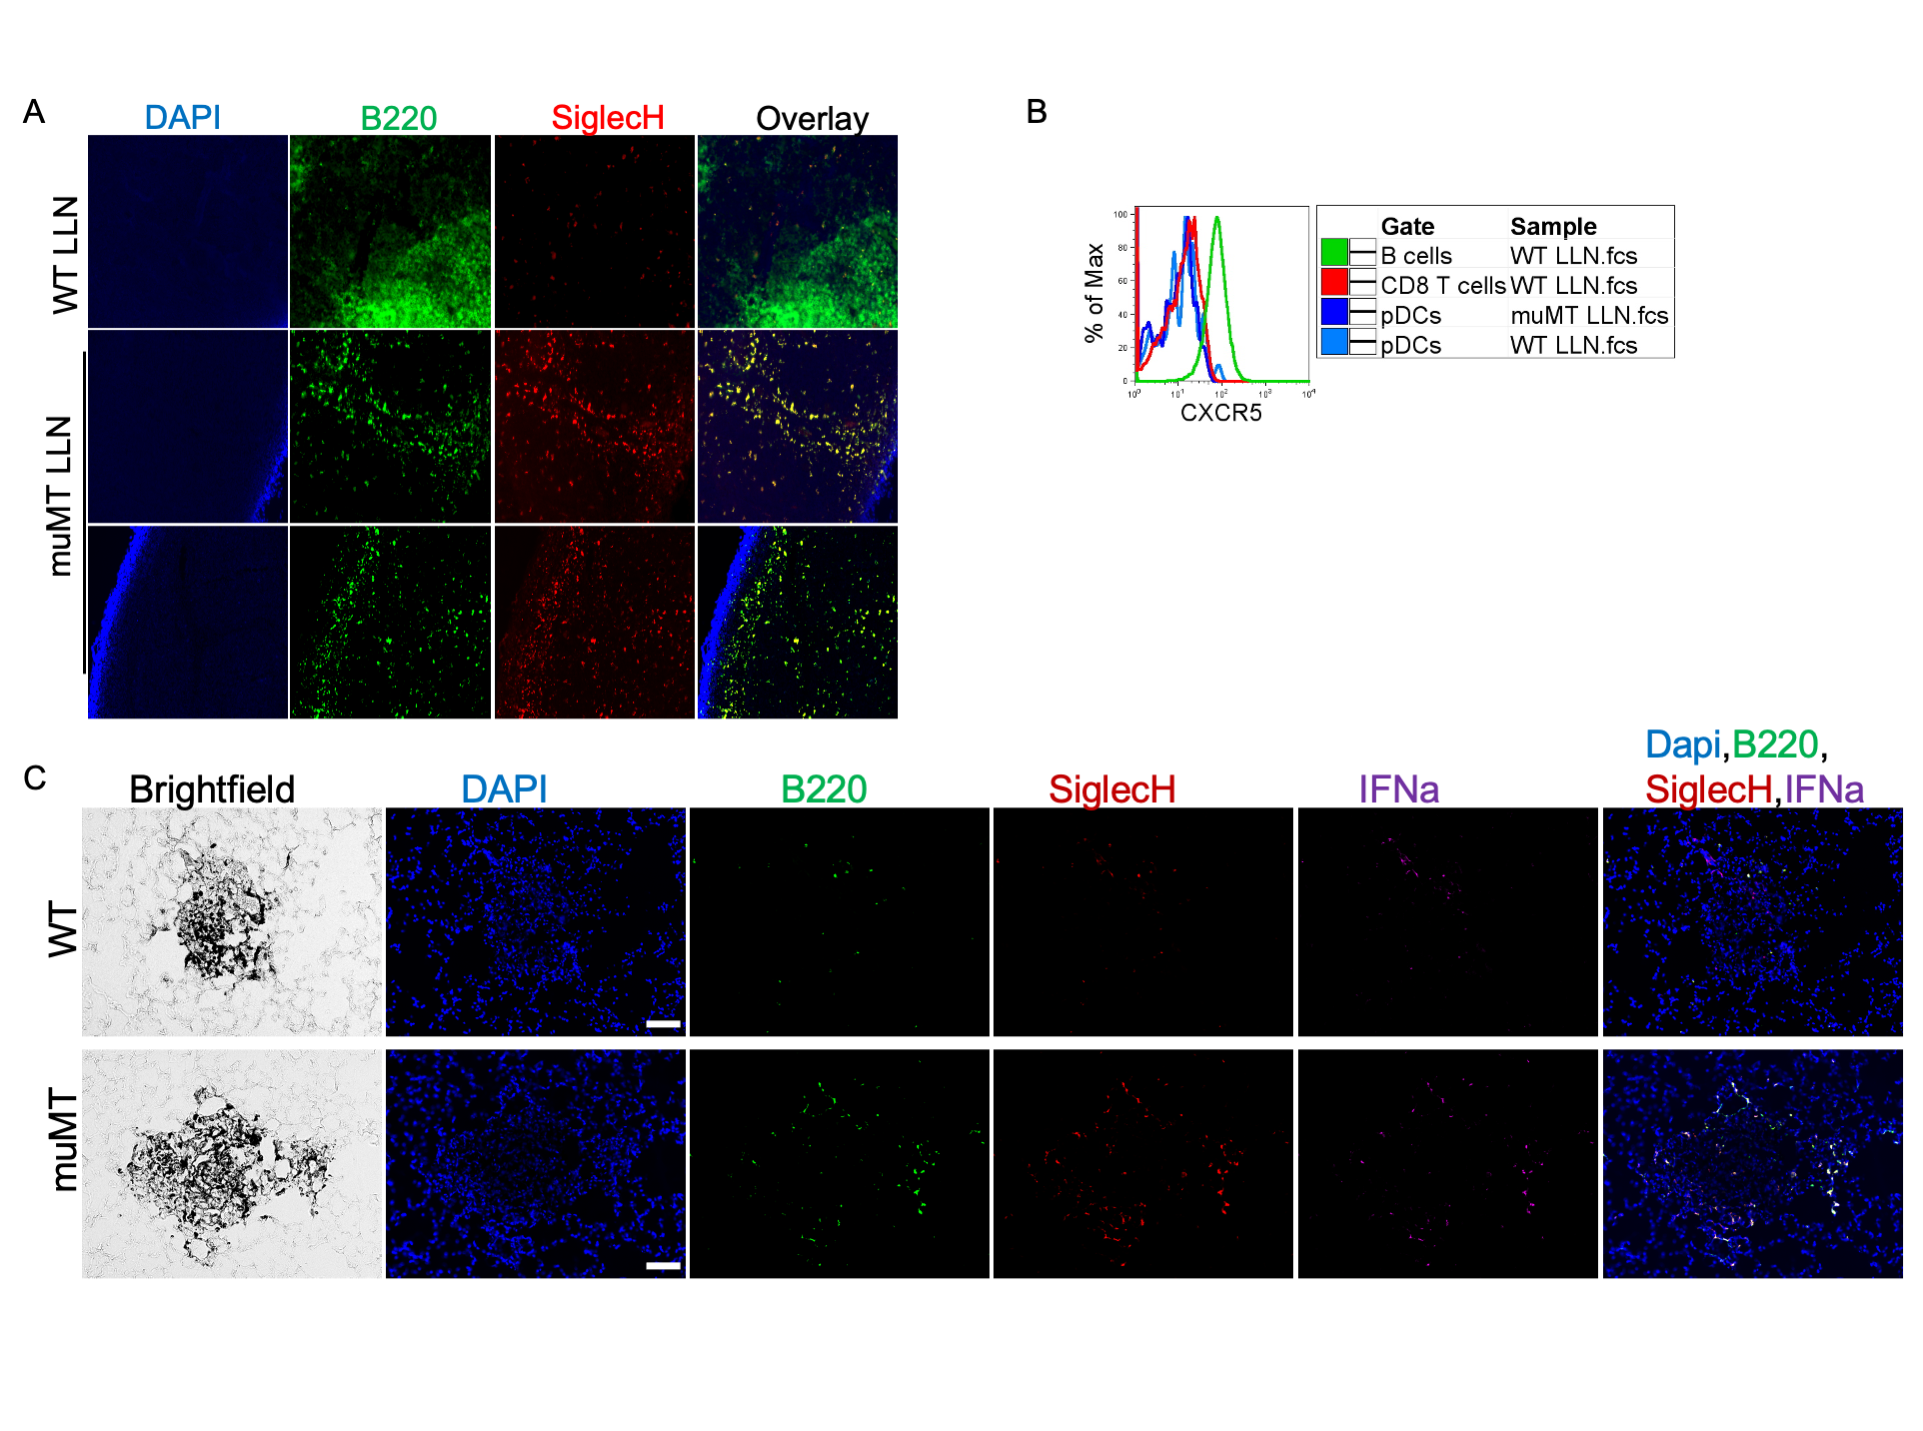

Supplement: supp [file elife-69713-supp-v1.zip › elife_poa_e69713_Figure_3_figure_supplement_1.tif]

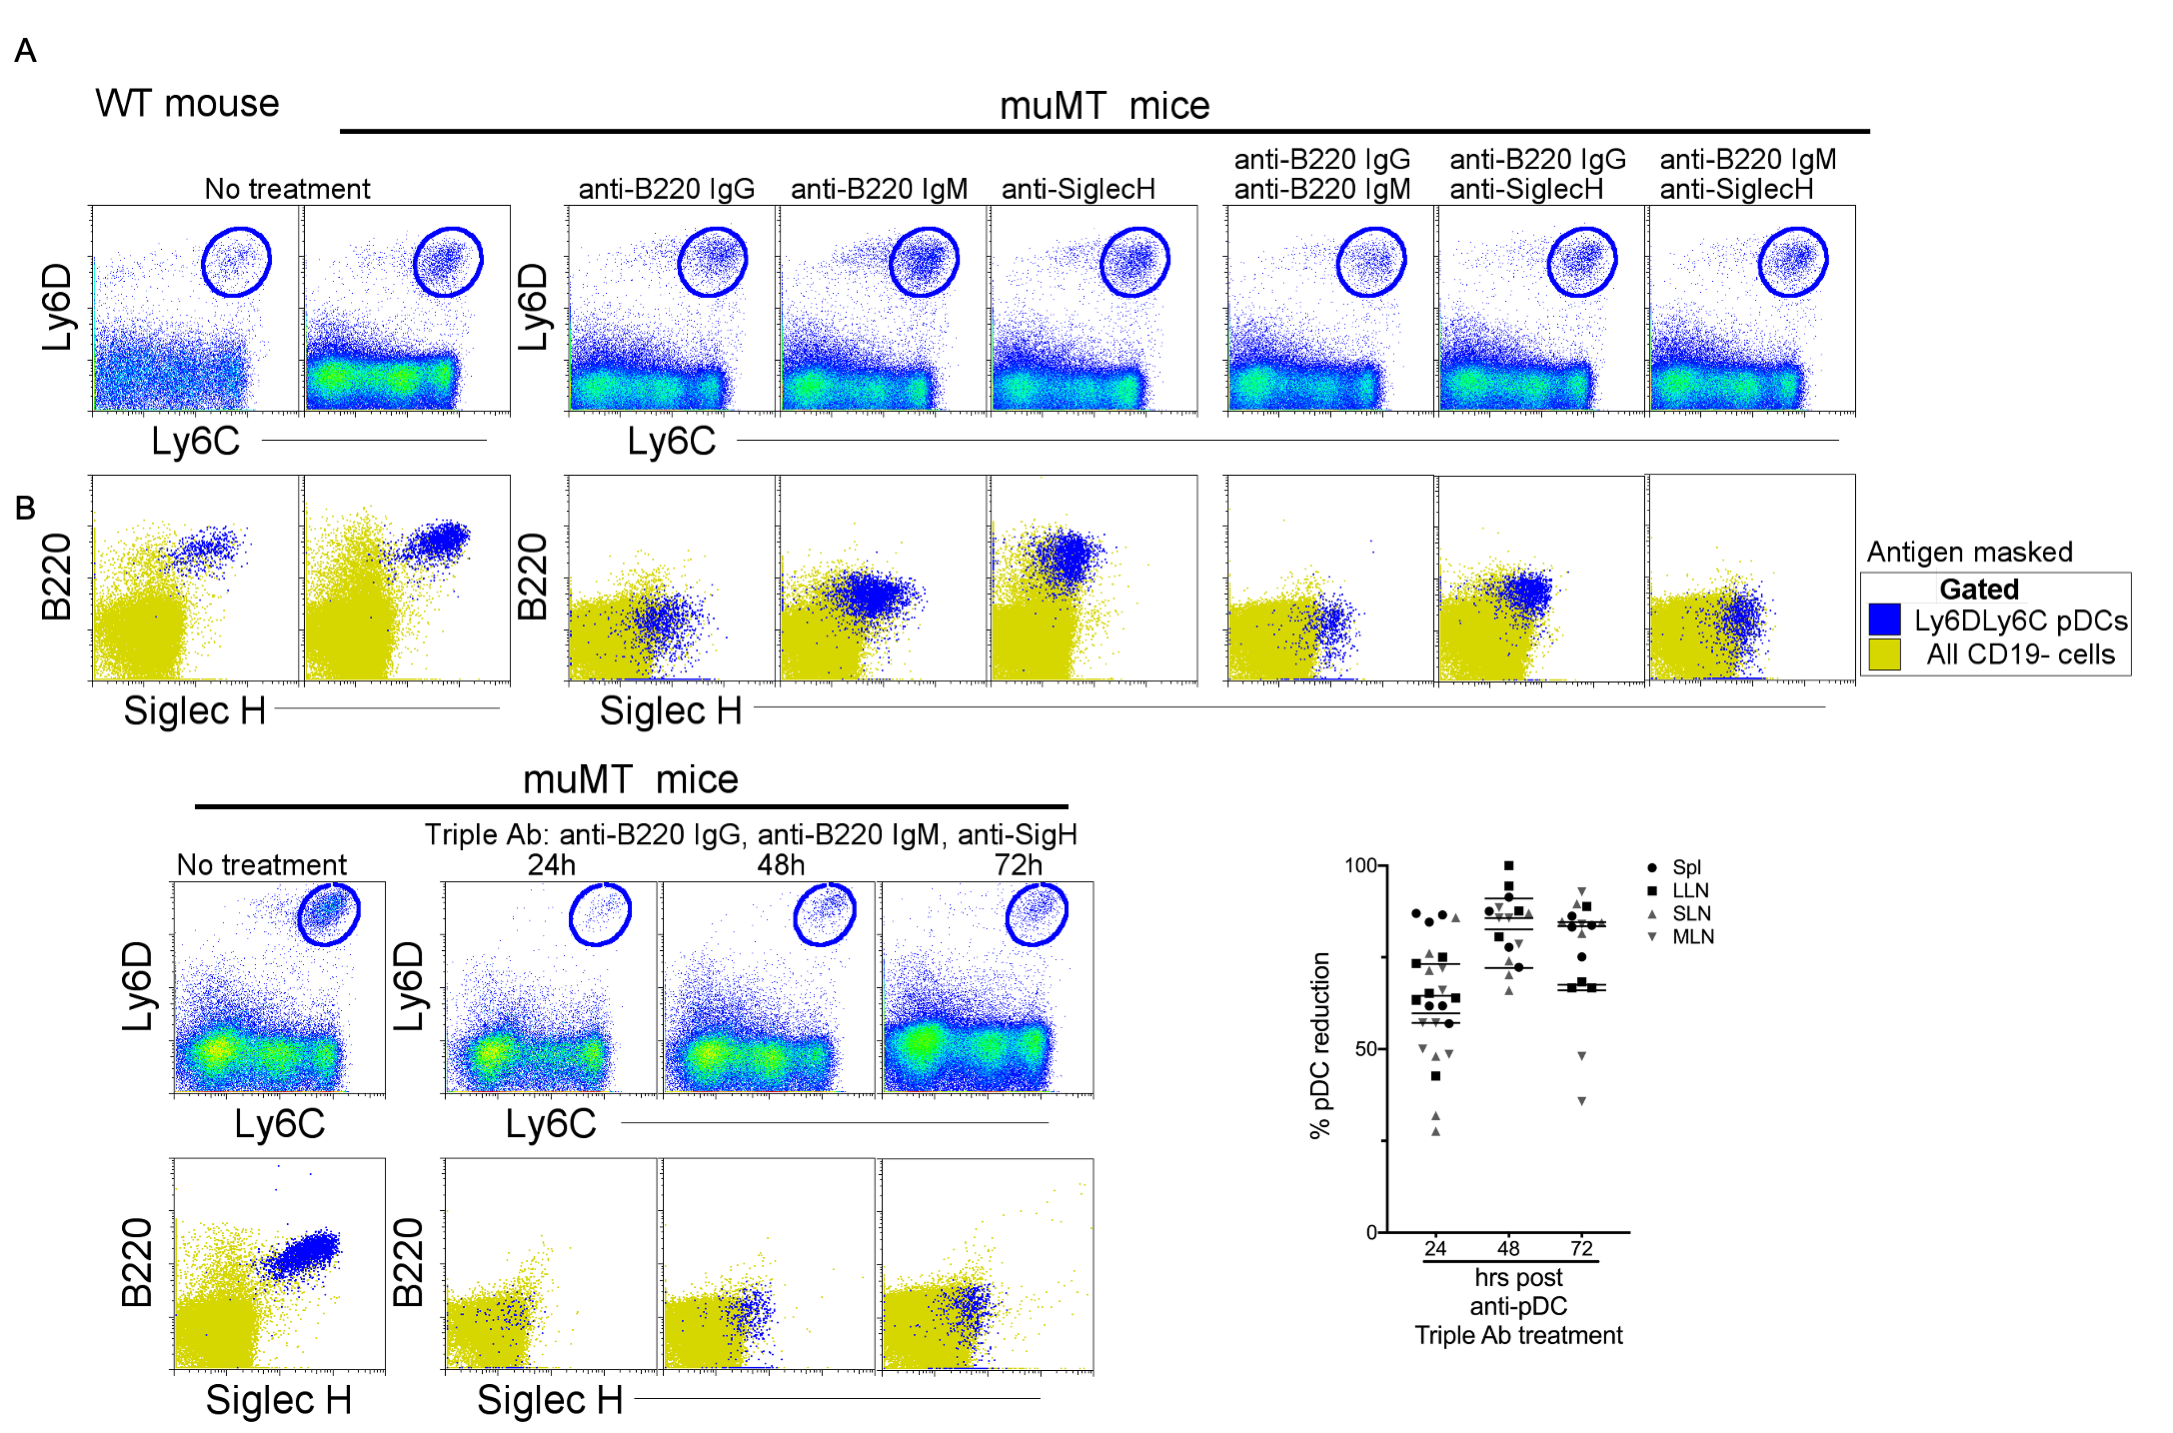

Supplement: supp [file elife-69713-supp-v1.zip › elife_poa_e69713_Figure_3_figure_supplement_2.tif]

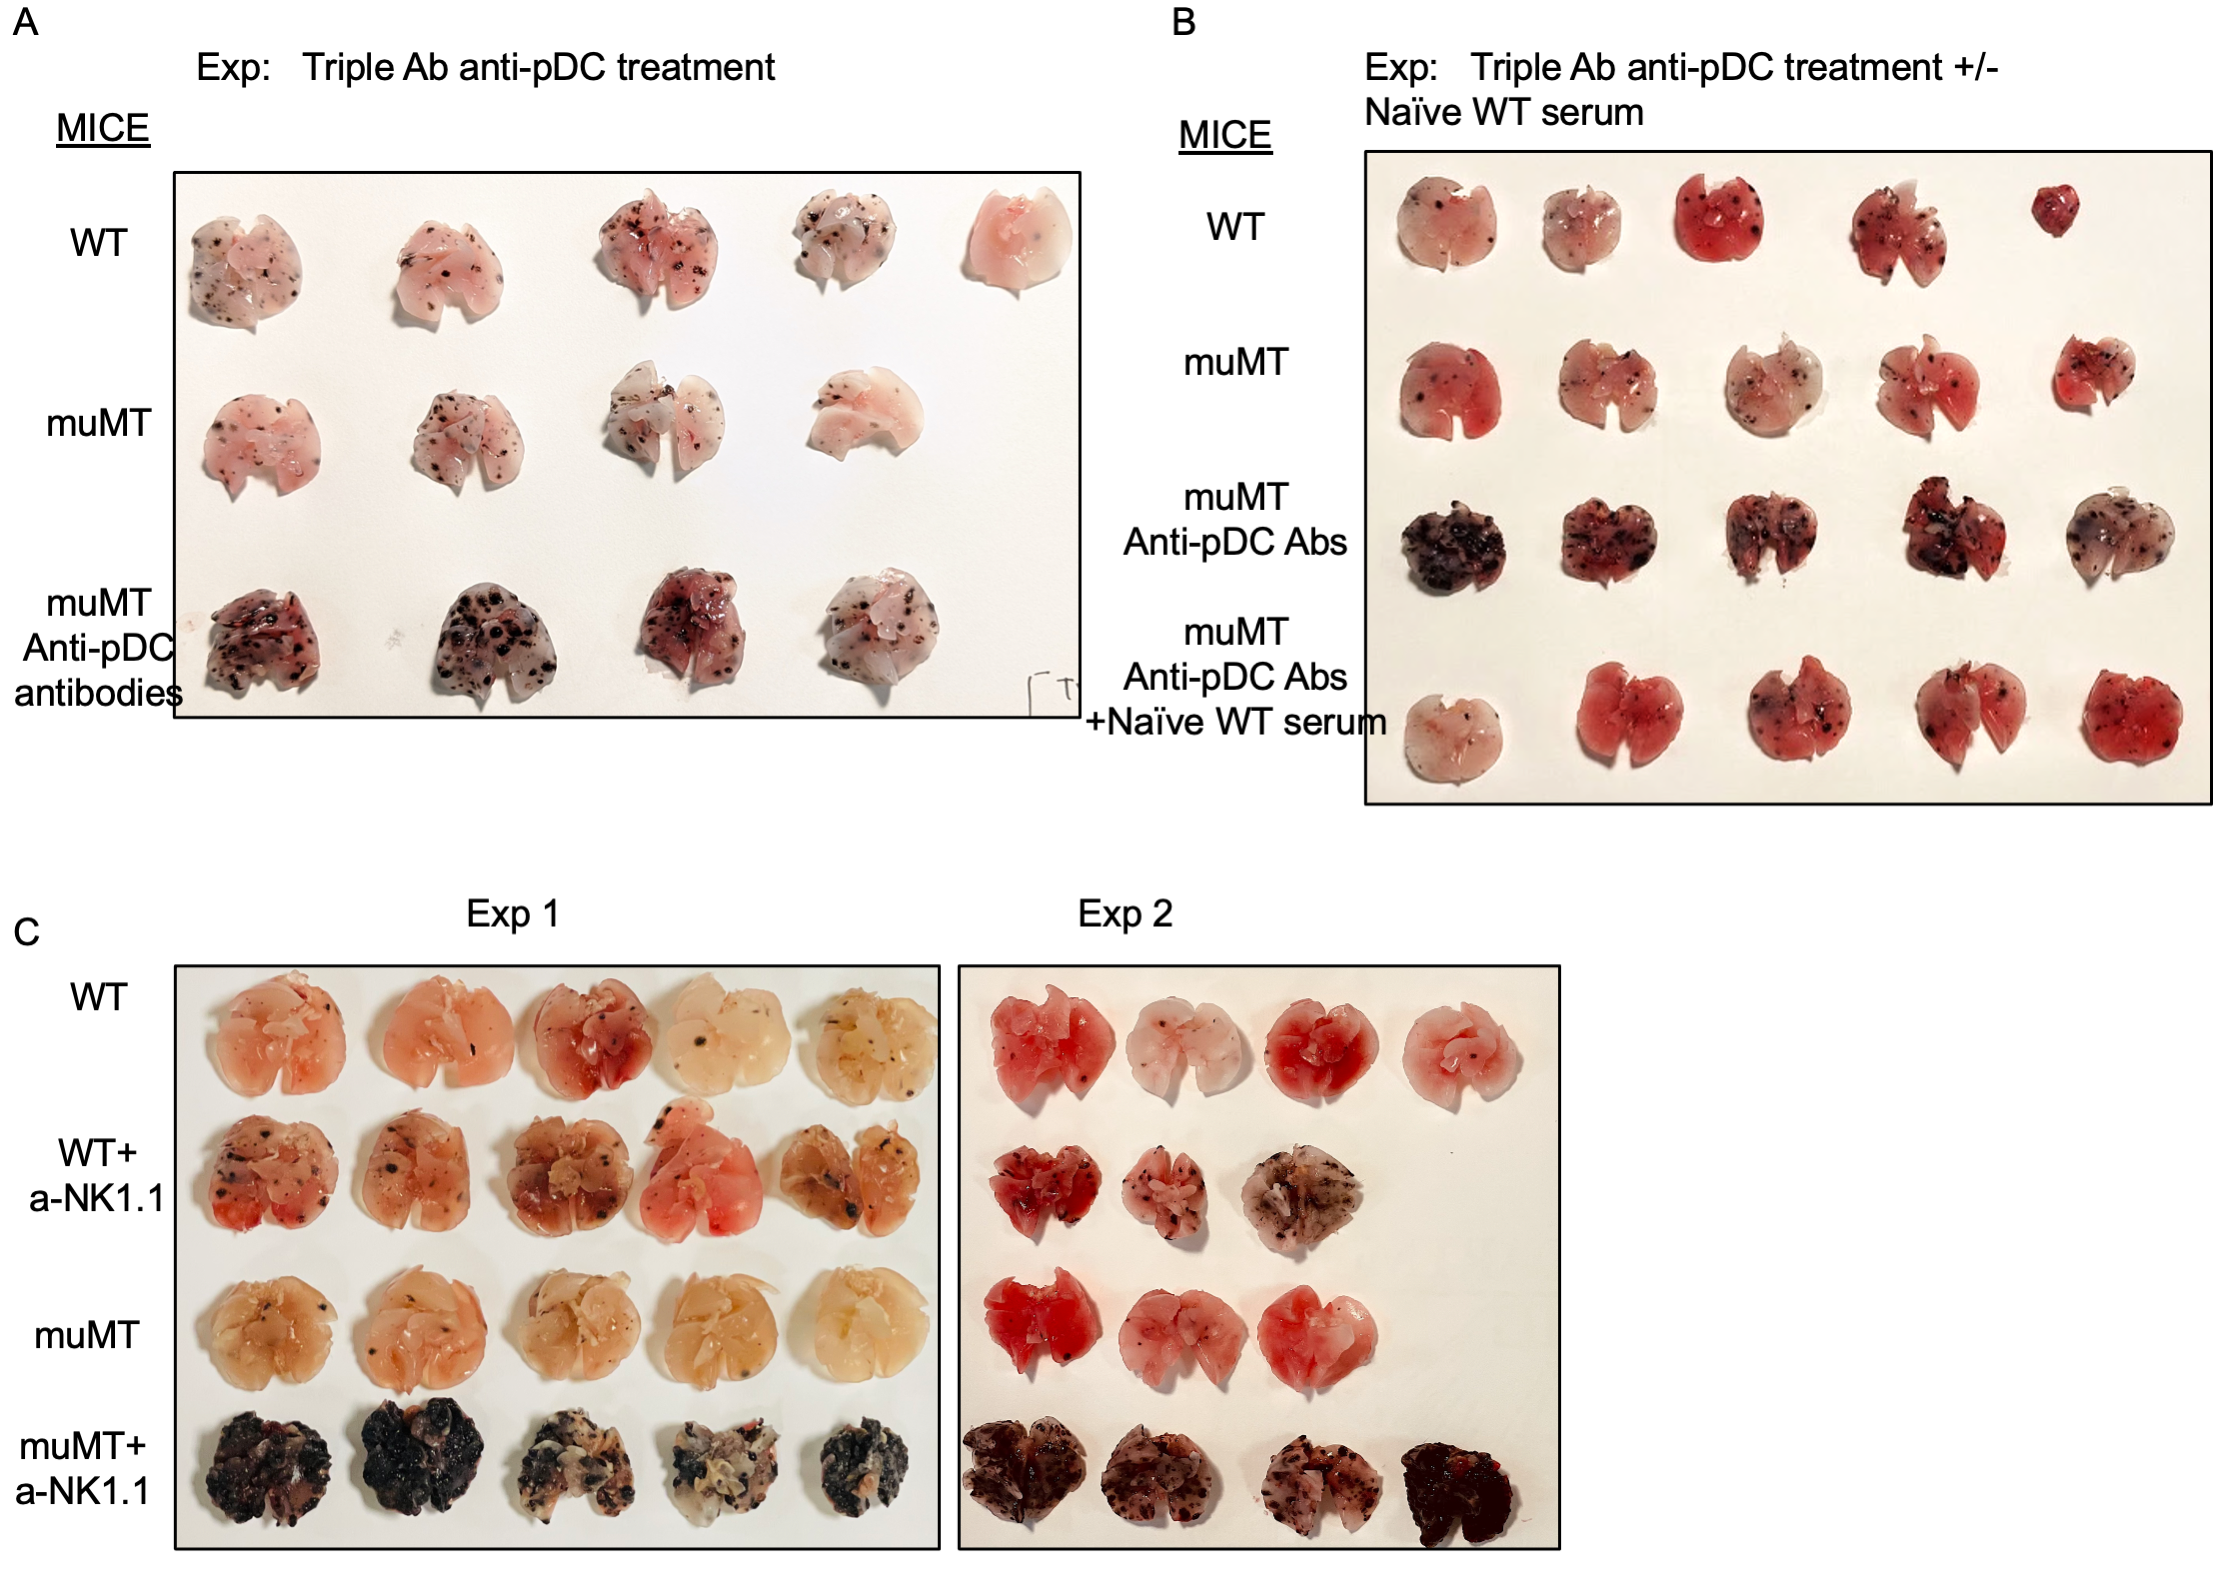

Supplement: supp [file elife-69713-supp-v1.zip › elife_poa_e69713_Figure_3_figure_supplement_3.tif]
